# Supplementary material
Source: Springer Nature journal article supplement (https://www.springermedizin.de/resource/supplementary/12937_2012_588_MOESM1_ESM.pdf/25653722)
Supplement: MOESM1 [file 25653722]

| Article              | Code | Type         | Test | Mode   | Test time                                    | Drink type during test                                                              | Drink during test per h |                                | *TT time difference                                                                      | Comment                                                 |
|----------------------|------|--------------|------|--------|----------------------------------------------|-------------------------------------------------------------------------------------|-------------------------|--------------------------------|------------------------------------------------------------------------------------------|---------------------------------------------------------|
|                      |      |              |      |        |                                              |                                                                                     | Fluid                   | CHO                            |                                                                                          |                                                         |
| Burke 2000 [10]      | A    | Carboloading | TT   | Cycle  | 148 min                                      | Both trials same 7 % GLUP                                                           | 1.1 L                   | 72 g                           | NS improved 1.1 %                                                                        | 3 d: 9 vs. 6 g CHO/kg BM/24 h                           |
| Burke 2002 [11]      | B    | Carboloading | S+TT | Cycle  | 120 +25 min                                  | Both trials same 6 % CHO, CHO not specified                                         | 0.7 L                   | 44 g                           | NS 0.0 %                                                                                 | 5 d: 9 vs. 3 g CHO/kg BM/24 h +1d: 10 g CHO/kg BM       |
| Beelen 2009 [12]     | C    | Mouth rinse  | TT   | Cycle  | 68 min                                       | 6.4 % MAL                                                                           | 0.0 L                   | 0 g                            | NS declined 0.9 %                                                                        | Mouth rinse each 12.5 % of TT                           |
| Jeukendrup 2008 [13] | E    | CHO vs. W    | TT   | Cycle  | 26 min                                       | 6 % SAC & GLU (3:2)                                                                 | 1.2 L                   | 70 g                           | NS declined 0.6 %                                                                        | Total volume ingested: 0.6 L                            |
| El-Sayed 1997 [14]   | E    | CHO vs. W    | TT   | Cycle  | 60 min                                       | 8 % GLU                                                                             | 0.3 L                   | 25 g                           | Improved 1.2 % (distance)                                                                |                                                         |
| Desbrow 2004 [15]    | F    | CHO vs. W    | TT   | Cycle  | 63 min                                       | 6 % CHO not specified                                                               | 1.0 L                   | 61 g                           | NS improved 0.2 %                                                                        |                                                         |
| van Essen 2006 [16]  | G    | CHO vs. W    | TT   | Cycle  | 135 min                                      | 6 % SAC                                                                             | 1.0 L                   | 60 g                           | Improved 4.4 %                                                                           |                                                         |
| Angus 2000 [17]      | G    | CHO vs. W    | TT   | Cycle  | 166 min                                      | 6 % CHO not specified                                                               | 1.0 L                   | 60 g                           | Improved 7 %                                                                             |                                                         |
| Langenfeld 1994 [18] | G    | CHO vs. W    | TT   | Cycle  | 241 min                                      | 7 % MAL & FRU (5:2)                                                                 | 0.5 L                   | 37 g                           | Improved 4.8 %                                                                           |                                                         |
| Rollo 2010 [19]      | H    | CHO vs. W    | TT   | Run    | 60 min                                       | 6.4 % CHO not specified                                                             | 0.4 L                   | 28 g                           | NS declined 0.7 %                                                                        | Additional 0.6 L & 38 g CHO 30 min pre-TT               |
| El-Sayed 1995 [20]   | I    | CHO vs. W    | S+TT | Cycle  | 60 +10 min                                   | 7.5 % GLU                                                                           | 0.7 L                   | 54 g                           | Improved 8.6 % (distance)                                                                |                                                         |
| Campbell 2008 [21]   | J    | CHO vs. W    | S+TT | Cycle  | a) 80+17 min<br>b) 80+17 min<br>c) 80+17 min | All 5.9 %:<br>a) SAC+GLU+FRU Drink<br>b) MAL+FRU Gel<br>c) SAC+GLU sports beans     | 0.7 L                   | 43 g                           | a) Improved 2.8 %<br>b) Improved 2.8 %<br>c) Improved 2.8 %                              |                                                         |
| Flynn 1989 [22]      | J    | CHO vs. W    | S+TT | Cycle  | 105 +15 min                                  | 7.7 % GLUP & FRU                                                                    | 0.7 L                   | 58 g                           | NS improved 2.8 % (power)                                                                |                                                         |
| Mitchell 1989 [9]    | J    | CHO vs. W    | S+TT | Cycle  | 105 + 15 min                                 | a) 6 % GLUP & SAC (2:1)<br>b) 12 % GLUP & FRU (2.4:1)<br>c) 18 % GLUP & FRU (4.1:1) | 0.6 L                   | a) 37 g<br>b) 74 g<br>c) 111 g | a) NS improved 6.0 % (power)<br>b) Improved 13 % (power)<br>c) NS improved 8.0 % (power) |                                                         |
| Ganio 2010 [23]      | K    | CHO vs. W    | S+TT | Cycle  | 120 +15 min                                  | 6 % CHO not specified                                                               | 0.9 L                   | 53 g                           | NS improved 9.8 % (total work)                                                           |                                                         |
| Hulston 2009 [24]    | K    | CHO vs. W    | S+TT | Cycle  | 120 + 59 min                                 | 6 % GLU & FRU (2:1)                                                                 | 0.8 L                   | 45 g                           | Improved 10 %                                                                            |                                                         |
| Clarke 2011 [25]     | L    | CHO vs. W    | S+TT | Soccer | 90 +3 min                                    | 6.6 % CHO not specified                                                             | 0.9 L                   | 59 g                           | a) pre-cooled: Improved 7.8 % (speed)<br>b) not cooled: NS 0.0 %                         | Exercise in the heat (30.5 °C), pre-cooled/ not cooled. |

TT:time trial; S+TT: submaximal exercise plus TT; CHO: carbohydrates; W: water; GLU: glucose; GLUP: glucose polymer; FRU: fructose; SAC: saccharose; MAL: maltodextrin; NS: not significantly; BM: body mass. Rows coloured blue represent studies with S+TT tests.

\*TT time compared to placebo.If time was not the measurement of the TT, then the measurement is specified (e.g. distance, power, speed)
